## Cont-ID:

# Detection of samples cross-contamination in viral metagenomic data

Johan Rollin\*<sup>1,2</sup>, Wei Rong\*<sup>1</sup> and Sébastien Massart<sup>1</sup>

\*These authors contributed equally to this work

1. *University of Liège, Gembloux Agro-Bio Tech, Plant Pathology Laboratory, 5030, Gembloux, Belgium*

2. *DNAVision, 6041, Gosselies, Belgium*

**Background:** High Throughput sequencing (HTS) technologies completed by the bioinformatic analysis of the generated data are becoming an important detection technique for virus diagnostics. They have the potential to replace or complement the current PCR-based methods thanks to their improved inclusivity and analytical sensitivity, as well as their overall good repeatability and reproducibility. Cross-contamination is a well-known phenomenon in molecular diagnostics and corresponds to the exchange of genetic material between samples. Cross-contamination management was a key drawback during the development of PCR-based detection and is now adequately monitored in routine diagnostics. HTS technologies are facing similar difficulties due to their very high analytical sensitivity. As a single viral read could be detected in millions of sequencing reads, it is mandatory to fix a detection threshold that will be influenced by cross-contamination. Cross-contamination monitoring should therefore be a priority when detecting viruses by HTS technologies.

**Results:** We present Cont-ID, a bioinformatic tool designed to check for cross-contamination by analysing the relative abundance of virus sequencing reads identified in sequence metagenomic datasets and their duplication between samples. It can be applied when the samples in a sequencing batch have been processed in parallel in the laboratory and with at least one external alien control. Using 273 real datasets, including 68 virus species from different hosts (fruit tree, plant, human) and several library preparation protocols (Ribodepleted total RNA, small RNA and double stranded RNA), we demonstrated that Cont-ID classifies with high accuracy (91%) viral species detection into (true) infection or (cross) contamination. This classification raises confidence in the detection and facilitates the downstream interpretation and confirmation of the results by prioritising the virus detections that should be confirmed.

**Conclusions:** Cross-contamination between samples when detecting viruses using HTS can be monitored and highlighted by Cont-ID (provided an alien control is present). Cont-ID is based on a flexible methodology relying on the output of bioinformatics analyses of the sequencing reads and considering the contamination pattern specific to each batch of samples. The Cont-ID method is adaptable so that each laboratory can optimise it before its validation and routine use.

**Keywords:**(1)

Bioinformatic, virus, detection, sequencing, contamination, metagenomic

## 41 **Background**

42  
43 The advent of high-throughput sequencing (HTS) technologies coupled with the development of powerful  
44 bioinformatics approaches has improved our ability to detect viruses in a non-targeted way from any  
45 sample collected from diverse sources. Noteworthy, detecting viruses by HTS technologies relies on many  
46 steps in the laboratory: sampling, transport and storage, nucleic acid extraction, library preparation, and  
47 sequencing (1). Compared to other molecular tests like (RT)-PCR, these steps are much more numerous  
48 and complex (2).

49 The analytical sensitivity, e.g. the ability to detect viral species at very low concentration in a sample, has  
50 been demonstrated to be similar to or even better than RT-PCR for animals (3) or plant viruses(4,5)). In  
51 addition, the inclusivity of HTS technologies, e.g. the ability to detect all isolates from a species and all  
52 species whose nucleic acids are present in enough quantity in a nucleic acid extract, is particularly high  
53 compared to any other detection test (2,6). Consequently, the use of HTS technologies is currently  
54 expanding at a rapid pace in research and is also progressively used for the diagnostic of viruses  
55 threatening humans (7), including SARS-Cov-2 (8), livestock (9) or plant health (10).

56 The broader application of HTS technologies for virus detection, with the simultaneous analysis of tens to  
57 hundreds of samples, is raising a significant challenge that needs to be addressed: the management of  
58 cross-contamination between samples. Scientists and diagnosticians already faced such challenges  
59 decades ago during the development of PCR-based techniques for detecting plants (11,12) or animal  
60 viruses (13,14), and this phenomenon might worsen with the use of HTS for virus detection (2). The higher  
61 complexity of laboratory operations, the intrinsically very high inclusivity, and the very low limit of  
62 detection (few viral reads are enough to detect the virus) of HTS make cross-contamination a more  
63 pressing issue. This is a frequently observed but, until recently, rarely reported observation in many, if not  
64 all, laboratories that have tested these technologies for virus detection. In many cases, these problems are  
65 frequently limited to a low number of reads and are of little consequence. Still, the specifics of the  
66 diagnostics field, with the need to detect viruses that can be at very low titre in the sample, clearly give  
67 more impact to such potential contamination problems (2). The occurrence of contamination is, therefore,  
68 a key element to consider when interpreting the viruses detected in HTS datasets.

69 The consequences of erroneous detection due to cross-contamination between samples can be  
70 catastrophic, as described for tuberculosis prior to HTS (15) but also using HTS for human and plant viruses  
71 (16,17).

72  
73 So, even if the cross-contamination issue of HTS is long known and discussed in the scientific community,  
74 proper methodologies and dedicated algorithms are still missing to address it. Until now, the burden of  
75 detection confirmation relied on the virologist's expertise and the use of laboratory tests to independently  
76 confirm the presence of the virus in the sample, which is a fastidious, costly, and time-consuming task. To  
77 minimise the confirmation burden, arbitrary thresholds (like 5 or 10 reads) (4,18) have been proposed to  
78 consider a detection valid. Still, these thresholds are subjectively fixed based on the sequencing/detection  
79 tools or the scientist's experience. In addition, it has been shown recently that the cross-sample  
80 contamination burden can be very variable between sequencing batches and that an adaptative threshold  
81 is required(5). Therefore, the need for formal bioinformatic pipelines for HTS-based data that consider the  
82 possible cross-contamination is growing (19).

83 To handle cross-contamination, several laboratory protocol improvements have been implemented over  
84 time: laboratory or reagent decontamination, alternate dual indexes, inter-run washing (20,21) or, more  
85 recently, the use of alien control. An alien control is defined as "a matrix infected by a target (called alien  
86 target) which belongs to the same group as the target organism to be tested in the samples, but that  
87 cannot be present in the samples of interest." (22). It is processed as external control alongside the sample

88 to be analysed. It is preferably the same type of matrix as the analysed samples: plant tissue, water ...  
89 Ideally, the alien target, in our case a virus, should be at a high concentration in the alien sample as it  
90 allows a better analysis of cross-contamination between samples. Indeed, the probability of detecting any  
91 virus at a low level due to cross-contamination rises if this virus is very abundant in at least one of the  
92 processed samples. A high abundance of the alien virus will therefore allow better monitoring of  
93 contaminations, including for other viruses highly abundant in at least one tested sample. The presence of  
94 sequencing reads from the alien virus in any tested sample can be considered the consequence of  
95 contamination from the alien control to this sample. Such information can be used to monitor the cross-  
96 contamination level between samples within the sequencing batch.  
97 Many generalist bioinformatic tools, such as Kraken (23) or BLAST (24) can detect the presence of viruses  
98 in HTS datasets with very high analytical sensitivity, as the detection is possible from a single viral read or  
99 contig. Some of them, like VirHunter (25), VirAnnot (26) or VirusDetect (27), have been specifically  
100 developed for that purpose. Nevertheless, they have not been designed to detect cross-contamination in  
101 the input datasets. Instead, they will detect a virus, whatever its origin: virus infection in the biological  
102 sample or contamination from another sample. The risk of contamination is particularly acute for viruses  
103 in very high abundance in one of the samples sequenced as a few contaminating reads can be detected by  
104 the bioinformatic tools in other samples prepared in parallel. The situation's impact is growing, especially  
105 in the diagnostic field (2), as false positive results due to contamination can lead to inaccurate data  
106 interpretation, which can cause tremendous health and trade issues.

107 According to EDAM ontology (28), tools that address cross-contamination issues should be labelled as  
108 "Sequence contamination filtering". We were looking for tools using EDAM terms and the usual ones (virus  
109 reads contamination, cross-contamination, ...). Some tools address similar issues like contamination on  
110 bacterial isolates (ConFindr- (29) or bacterial metagenome (GUNC - (30). They both use methods relying  
111 on operons organisation of genes that are not applicable for viruses. Croco (31) uses an approach mainly  
112 based on bacterial quantitative data. Finally, DecontaMiner (32) can be applied to metagenome data,  
113 including viruses but is based on a combination of detection methods (mainly mapping and Blast) that try  
114 to assign the dark matter (reads from unknown origin) more than formally detecting the cross-  
115 contamination material. To our knowledge, there is no tool specifically addressing cross-contamination  
116 during virus detection in metagenome datasets. It means that some risks of false positive results remain  
117 unmonitored for virologists, and the burden of confirmation of detection in case of false positive is still not  
118 addressed.

119 To solve this issue, we present Cont-ID, a method designed to check sample cross-contamination for  
120 viruses previously identified in metagenomic datasets. It relies on a simple requirement: every sample in  
121 a sequencing batch should have been processed at the same time and followed the same steps in the  
122 laboratory with at least one alien control as external control. Cont-ID uses a voting system to classify every  
123 species prediction on each sample of the sequencing batch into (true) infection or (cross)  
124 contamination. This tool will help the virologist to distinguish virus presence and virus cross-contamination  
125 in HTS data improving the reliability of viral detection and the efficiency of downstream confirmation and  
126 characterisation analyses. It can also help to improve feedback on upstream steps that might be linked to  
127 cross-contamination events. Cont-ID is an open-source python (v3) based script method freely available  
128 here: [https://github.com/johrollin/viral\\_contamination](https://github.com/johrollin/viral_contamination).

129  
130

## 131 **Methods:**

132

## 133 **Implementation**

134  
135 In viral metagenomics, detecting multiple viral species in the same sample is frequent, and a virus species  
136 can be seen with different confidence levels in several samples of the same sequencing batch. Therefore,  
137 Cont-ID aims to determine whether a given detected virus in a sample is likely to be a contaminant or not  
138 by comparing it to the results from the other samples of the same sequencing batch, e.g. samples  
139 processed in parallel and following the same laboratory steps.

140 Cont-ID does not require any development or maintenance of database as it only relies on data generated  
141 by usual bioinformatics tools for HTS dataset analyses and, most specifically, two elements: (i) the  
142 normalised abundance estimation (number of reads assigned to each detected virus species on each  
143 sample) and (ii) the number of identical reads among pairs of samples (deduplication ratio). These input  
144 metrics are easy to obtain as the abundance estimation can be calculated by using any mapping tool like  
145 BWA (33) or a read classifier like Kraken/Bracken (23,34), and the number of identical reads from a virus  
146 between two samples can be obtained by running any deduplication tool like BBduck (35). A tabulated file  
147 containing these numbers associated with the detected virus name and the unique ID for each batch  
148 sample is used as input for Cont-ID, as shown in **Figure 2**. Each virus predicted on each batch sample is  
149 considered a distinct element and corresponds to a line in the generated table. A separate table is  
150 generated for the alien virus.

151 Computing the two elements mentioned above into three different metrics for the alien virus and each  
152 detected virus, Cont-ID can predict through three rules if a given viral species detection is likely a cross-  
153 contaminant or not in the sequencing batch, as described in **Figure 1**.

154

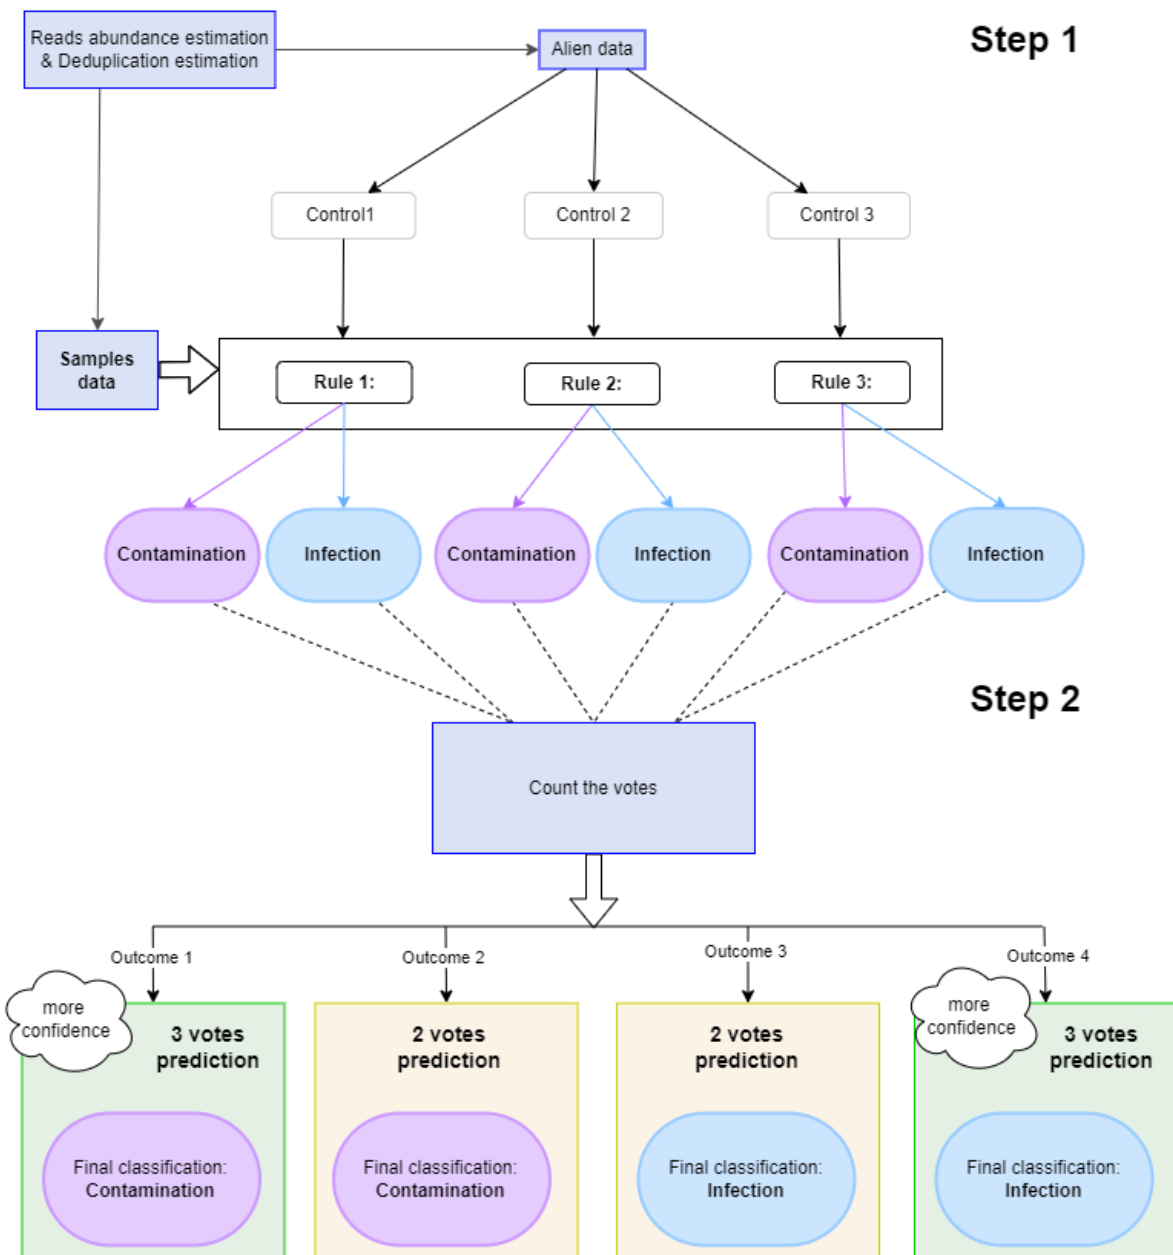

155

156 **Figure 1: Cross-contamination prediction with Cont-ID.**

157 *There are two input files, one for the alien data and one for the samples data. Alien file is used to*  
158 *calculate control thresholds which are then used along with the sample data to apply rules to a voting*  
159 *system (step 1). The votes are then counted to decide for each virus on each sample (element) either if it*  
160 *is a (cross)contamination or an infection (step 2).*

161 The three rules classify as contamination or infection each element according to the pattern of reads  
162 number observed among the samples and the alien control for the alien virus and the considered viral

163 species. Rules one and two both use the (normalised) reads abundance estimation, while rule three uses  
 164 the assessment of unique (identical) reads. Rules are calculated after normalising the number of reads  
 165 per sample and are described more precisely in **Figure 2**.

166

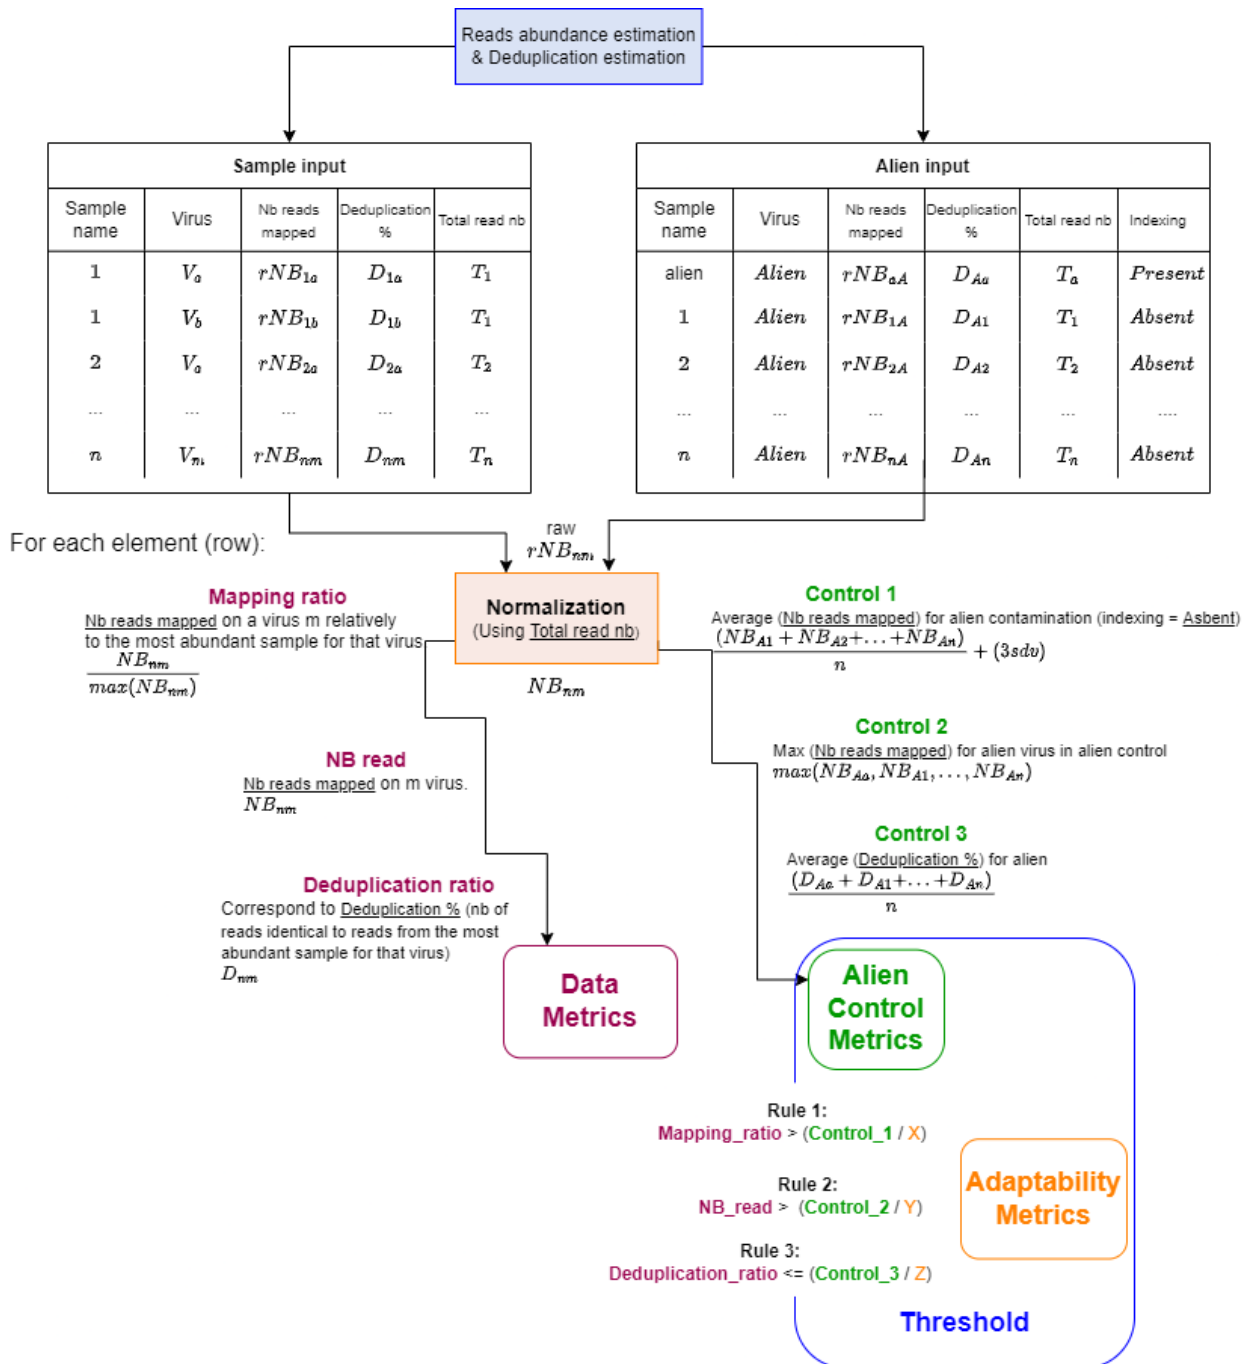

167

168

169 **Figure 2: Cont-ID rules explanation.**

170 There are two input files, one for the alien data and one for the samples data. Alien file is used to calculate  
 171 each alien control metric after normalisation. The sample file is used to calculate each data metric after  
 172 normalisation. Each alien control metric is associated with a user (manually) designed adaptability metric

173 *(X, Y or Z) to compose each rule's threshold. Finally, each Data Metric is compared to the corresponding*  
174 *threshold in order to obtain the three rules used in Cont-ID.*

175  
176 The first rule uses the mapping ratio of each virus in each sample (corresponding to an element): the  
177 number of reads of each element is divided by the maximum number of reads of the corresponding virus  
178 in one of the samples. This first rule compares this mapping ratio for the element with the Control 1 metrics  
179 calculated for the alien virus and corresponds to the average number of reads mapped on the alien virus  
180 in the samples for which the alien is a cross-contaminant, with three times the standard deviation of this  
181 average.

182 The second rule relies on the number of reads of the element in the sample. The rule compares it with  
183 Control 2, corresponding to the number of alien reads identified in the alien control. The third rule is based  
184 on each element's deduplication ratio, which is compared with Control 3. The average deduplication ratio  
185 of the alien virus reads between each tested sample and the alien control.

186  
187 We aimed to find the most reliable formula for threshold calculation on each rule while allowing a part of  
188 adaptability according to the biological system used. As the system variability can come from the  
189 laboratory using HTS, the host and type of sample (fruit tree, herbaceous plant, human, animal ...), the  
190 type of virus (integrated or non) or the extraction protocol used (dsRNA, total RNA, small RNA...), each  
191 rule includes a third number (represented by X, Y or Z) that is called adaptability metrics (see **Figure 2**).  
192 The X will impact the first rule that considers the relative proportion of reads of a virus in this sample  
193 compared to the sample with the maximum read of this virus. This threshold is a refinement of the "alien  
194 threshold" described earlier(5). The default value proposed is 2. The Y divides the number of reads from  
195 the alien virus in the alien control for comparing it to the number of reads of each virus in each sample. In  
196 this publication, a default value of 1,000 has been fixed for Y, and it was in the range of the expected  
197 (cross) contamination ratio (number of reads in the truly infected sample versus the number of reads in  
198 contamination one). The Z metric impacts Control 3 and the evaluation of the proportion of identical reads  
199 between different samples. The proportion of identical reads can be influenced by different factors  
200 (mutation rate, respective genome length ...). The role of Z is to consider those different factors. A default  
201 value of 1.5 is proposed.

202 Default values of the three adaptability metrics have been provided in this publication after their  
203 optimisation on the banana datasets and their evaluation of other datasets. Nevertheless, users can  
204 independently modify them during the evaluation or validation of Cont-ID applied to their datasets. A  
205 careful evaluation of the adaptability metrics by the user is recommended to evaluate their impact on the  
206 diagnostic performance of the test. In addition, several sets of adaptability metrics can be run in parallel  
207 for further improvements in diagnostics performance. The value given to the adaptability metrics and  
208 controls resulting is always recorded in an additional log file (see Supplementary File 1 [log\_file]). This log  
209 file help to ensure traceability allowing the user to check the pertinence of the chosen numbers and to  
210 adapt them when needed. As each of the three rules has two possible decisions (contamination or  
211 infection), a majority vote will be obtained with two or three votes. The decision of each vote is available  
212 in the generated result to support the result interpretation and let the user decides on the confidence to  
213 give to each individual rule according to the biological system tested.

214 In addition, the proper quantitative comparison of sequencing reads datasets relies on normalising the  
215 number of reads per sample, for example, as always done for transcriptomic or microbiome studies. This  
216 assertion is also true for Cont-ID and corresponds to an adaptative parameter. To limit some bias due to  
217 the difference in sequencing depth between samples in the same batch, we also normalise by default to 5  
218 000 000 reads in this publication. Still, it is manually changeable by the user.

219 Finally, Cont-ID also has another level of flexibility: the script is made to ease the change of rules in the  
220 code that can complete or replace the existing ones.

221

## 222 **Conditions of application for Cont-ID**

223

224 Three main conditions are essential to run Cont-ID. First, an alien control should be used, alien control  
225 should contain a high concentration of the alien virus, so reads from that viral species are more prone to  
226 be detected in other samples when cross-contamination occurs from the alien control to the other  
227 samples. Similarly, if another virus is found in the alien control sample, that is also an indication of potential  
228 contamination (although not used so far by Cont-ID). The alien control is bioinformatically processed  
229 exactly as the samples of interest to generate the alien metrics for each sample (in a separate tabulated  
230 file). In the absence of external alien control, it is still possible to analyse sequencing batches if they include  
231 samples from different host species and some detected viruses, preferably at high abundance, are known  
232 to infect only some of the host species. In such a case, the alien file should be filled with the selected virus  
233 as if it was an alien (with the status of alien present/absent in the file). Nevertheless, the threshold set-up  
234 and the results will be less accurate and include fewer samples (the samples corresponding to species that  
235 can be hosts for the virus could not be considered). In addition, a high degree of confidence is needed  
236 regarding the actual infection of the sample selected as alien control by the virus selected as an alien virus.  
237 Cont-ID always requires at least one (cross) contamination in the alien file to be reported; otherwise, the  
238 threshold calculation will fail; in that case, the tool will state it.

239

240 The second application condition is related to the processing of the samples and the alien control. The  
241 alien control and all the other samples in a given batch should have been processed together in parallel  
242 for all the laboratory steps (RNA/DNA extraction, library preparation, sequencing) and bioinformatics  
243 (Reads cleaning, host removing ...). This is a good diagnostic practice, but it is even more important here  
244 as the goal is to observe cross-contamination levels. The assumption is that the level seen with the alien  
245 represents what could have happened in samples of interest. Therefore, this assumption depends on  
246 processing all samples and control in parallel.

247

248 The third condition is that, once the user has fixed the adaptability metrics, the analysis should be carried  
249 out batch per batch. The calculation of sample and alien metrics is dynamically done for each batch as  
250 cross-contamination patterns can strongly vary between batches, as recently shown for banana samples  
251 (5).

252

253

## 254 **Sequencing reads datasets**

255

256 The first datasets (batches A to D) were generated in our laboratory by total RNA sequencing protocol with  
257 ribodepletion applied to RNA extracted from banana plants (belonging to the *Musa* genus) (5). These data  
258 were generated to compare the test performance criteria of high throughput sequencing with classical  
259 virus testing protocols that include ImmunoCapture (IC)-(RT)-PCR and electron microscopy (36). The alien  
260 control corresponded to wheat plants infected by two species of barley yellow dwarf virus (BYDV-PAS and  
261 BYDV-PAV)(5). In total, four sequencing datasets (called A, B, C, and D) composed respectively of 27, 20,  
262 27 and 25 samples were generated independently. A fifth batch generated during this validation  
263 experiment using diluted samples for evaluating the limit of detection (analytical sensitivity) was not  
264 included in our analysis according to the recent guidelines proposed for statistical analysis of validation  
265 datasets for plant pest detection (22). A total of 10 different viral species were infecting these samples,  
266 including banana mild mosaic virus (BanMMV), banana bract mosaic virus (BBrMV), banana bunchy top



267 virus (BBTV), cucumber mosaic virus (CMV), and five species belonging to the banana streak virus (BSV)  
 268 species complex. In addition, two other sequencing protocols were applied to some banana plants, small  
 269 RNA sequencing (5) starting from the same RNA extract as total RNA sequencing (for 21 samples in a single  
 270 batch) and double-stranded RNA (dsRNA) enrichment and sequencing protocol (37) applied from plant  
 271 tissue of 13 samples in a single sequencing batch.

272

| Batch_ID                                | NB of samples | Host type    | Extraction Method                  | Extraction kit                                                                              | Library kit                                                                                                                                                                                                       | Sequencing                                                  | Data link                                                | Publication                                                                                                                       |
|-----------------------------------------|---------------|--------------|------------------------------------|---------------------------------------------------------------------------------------------|-------------------------------------------------------------------------------------------------------------------------------------------------------------------------------------------------------------------|-------------------------------------------------------------|----------------------------------------------------------|-----------------------------------------------------------------------------------------------------------------------------------|
| A (1)                                   | 27            | Plant (Musa) | Total RNA extraction               | RNeasy Plus Mini Kit (Qiagen, Venlo, Netherlands)                                           | Stranded Total RNA library Prep Human/Mouse/Rat Illumine CA, United States) & Ribo-Zero™ Plant Leaf Kit (Illumine CA, United States)                                                                              | Illumina NextSeq 500 2X150                                  | BioProject: PRJNA777477 samples starting with (1-XXX)    | Wei et al., accepted.                                                                                                             |
| B (2)                                   | 20            | Plant (Musa) | Total RNA extraction               | RNeasy Plus Mini Kit (Qiagen, Venlo, Netherlands)                                           | Stranded Total RNA library Prep Human/Mouse/Rat Illumine CA, United States) & Ribo-Zero™ Plant Leaf Kit (Illumine CA, United States)                                                                              | Illumina NextSeq 500 2X150                                  | BioProject: PRJNA777477 samples starting with (2-XXX)    | Wei et al., accepted.                                                                                                             |
| C (3)                                   | 27            | Plant (Musa) | Total RNA extraction               | RNeasy Plus Mini Kit (Qiagen, Venlo, Netherlands)                                           | Stranded Total RNA library Prep Human/Mouse/Rat Illumine CA, United States) & Ribo-Zero™ Plant Leaf Kit (Illumine CA, United States) & TruSeq® Stranded Total RNA Library Prep Plant (Illumine CA, United States) | Illumina NextSeq 500 2X150                                  | BioProject: PRJNA777477 samples starting with (3-XXX)    | Wei et al., accepted.                                                                                                             |
| D (5)                                   | 25            | Plant (Musa) | Total RNA extraction               | RNeasy Plus Mini Kit (Qiagen, Venlo, Netherlands)                                           | TruSeq® Stranded Total RNA Library Prep Plant (Illumine CA, United States)                                                                                                                                        | Illumina NovaSeq 6000 2X150                                 | BioProject: PRJNA777477 samples starting with (5-XXX)    | Wei et al., accepted.                                                                                                             |
| E (6 sRNA)                              | 31            | Plant (Musa) | Total RNA extraction               | RNeasy Plus Mini Kit (Qiagen, Venlo, Netherlands)                                           | SMARTer smRNA-Seq Kit (Clontech)                                                                                                                                                                                  | Illumina NovaSeq 6000 2X150                                 | BioProject: PRJNA777477 samples starting with (1sR-XXXX) | Wei et al., accepted.                                                                                                             |
| F (5 dsRNA)                             | 9             | Plant (Musa) | Double stranded RNA                | see article (Armelle Marais)                                                                | NEBNext Ultra II DNA library prep kit (New England BioLabs, US)                                                                                                                                                   | Illumina NovaSeq 6000 2X150                                 | BioProject: PRJNA777477 samples starting with (5ds-XXX)  | Method: Marais et al., 2018 <a href="https://doi.org/10.1007/978-1-4939-7683-6_4">https://doi.org/10.1007/978-1-4939-7683-6_4</a> |
| G (Queensland university of technology) | 5             | Plant (mix)  | Total nucleic acid                 | waxwell Kapru Sample Concentrator instrument using SimplyRNA Tissue kit (AS1340, Promega)   | TruSeq Stranded Total RNA                                                                                                                                                                                         | Illumina NovaSeq 6000 2X150                                 | BioProject: PRJNA752836                                  | Gauthier, M.-E. A., et all <a href="https://doi.org/10.3390/BIOLOGY11020263">https://doi.org/10.3390/BIOLOGY11020263</a>          |
| H                                       | 49            | Human        | Total nucleic acid + amplification | NuclISENS EasyMAG platform (bioMérieux, Marcy l'Etoile, France)                             | Nextera XT (Illumina, San Diego, CA, USA)                                                                                                                                                                         | Illumina NextSeq 500 2X150                                  | bioproject: PRJNA494633                                  | Bal et al., 2018 <a href="https://doi.org/10.1186/s12879-018-3446-5">https://doi.org/10.1186/s12879-018-3446-5</a>                |
| I                                       | 25            | Human        | Total nucleic acid                 | MagNAPure 96 DNA and Viral NA Small Volume Kit (Roche Diagnostics, Almere, the Netherlands) | EBNext Ultra Directional RNA Library Prep Kit for Illumina (New England Biolabs, Ipswich, MA)                                                                                                                     | Illumina HiSeq 4000 and NextSeq 500 depth: 10 million 2X150 | bioproject: PRJNA560243                                  | Boheemen et al., 2020 <a href="https://doi.org/10.1016/j.jmoldx.2019.10.007">https://doi.org/10.1016/j.jmoldx.2019.10.007</a>     |
| J                                       | 55            | Human        | Total nucleic acid                 | TRIzol LS reagent (Invitrogen, USA)                                                         | SMARTer® Stranded Total RNA-Seq Kit v2 - Pico Input Mammalian (Takara Bio, USA) and the Trio RNA-Seq kit (NuGEN Technologies, USA)                                                                                | Illumina HiSeq 2X150                                        | bioproject: PRJNA540900                                  | Li, et al., 2020 <a href="https://doi.org/10.1038/s41598-020-60992-6">https://doi.org/10.1038/s41598-020-60992-6</a>              |

273

274 **Table 1: list of datasets used on Cont-ID**

275

276 BSV is a species complex (genus: *Badnavirus*, family: *Caulimoviridae*) among which five species were  
 277 included in our samples: banana streak CA virus (BSCAV), banana Goldfinger virus (BSGFV), banana streak  
 278 IM virus (BSIMV), banana streak Mysore virus (BSMYV), and banana streak OL virus (BSOLV). Notably, some  
 279 species of this complex have their genome fully or partially integrated into the plant genome as  
 280 endogenous viral elements (EVE), most specifically in B genomes originating from *M. balbisiana*. These  
 281 EVE can be transcribed in the plant, and for some BSV species, they can even trigger an infection with viral  
 282 particles of BSV in the plant (38). It is well documented that BSGFV, BSIMV and BSOLV are constitutive of  
 283 *Musa balbisiana* (B genome) but can be activated in some conditions (39). In addition, BSMYV is also  
 284 integrated into the Musa B genome, although the ability to produce infectious viral particles is not yet  
 285 demonstrated. This brings additional complexity as EVE can be transcribed without the presence of a viral

286 particle. It has been recently demonstrated that the detection of BSV transcripts by HTS tests must be  
287 confirmed by an independent test such as immunocapture (IC)-PCR for confirming the presence of viral  
288 particles (5).

289 The other datasets used in this work came from publicly available datasets listed in **Table 1** and were  
290 already included in peer-review publications. They were selected because they fit two criteria: (i) having  
291 all virus presence checked in all the samples and (ii) having a virus species that could act like an alien  
292 control for the input file. First, another set generated to detect viruses from diverse plant samples by high  
293 throughput sequencing of total RNA extraction was kindly provided by Queensland University of  
294 Technology (17), corresponding to a total of 19 plant viruses and viroid in 5 samples. In addition, the  
295 datasets generated from human samples came from published data from 3 different sources, with a total  
296 of 129 samples containing 39 viral species (40–42). These three human datasets allowed us to test Cont-  
297 ID with a large diversity of viruses, with different extraction and sequencing methods listed in  
298 Supplementary File 2.

299  
300 In total, ten sequencing batches, including 273 samples and the presence of 68 viral species, were used to  
301 test the potential impact of a different host, extraction, and sequencing method on Cont-ID performances.  
302 All the data generated are available with the link and procedure applied to obtain them described in **Table**  
303 **1**; the indexing status of each virus in each sample is also available in Supplementary File 2.

304

## 305 **Bioinformatic analyses**

306

### 307 **Quality control and mapping of sequencing reads**

308

309 For all datasets, read quality control (quality trimming, reads deduplication) was performed using a  
310 standard procedure described elsewhere (5). The cleaned reads were then mapped to a custom-built  
311 database (DB) containing all complete genome sequences from previously detected viruses in the datasets.  
312 For banana samples, all the complete genome sequences of the viruses were downloaded from NCBI nt  
313 database on (12/12/2020) to serve as mapping DB. While the BYDV reference (KU170668 – for the alien  
314 control) was selected as it was the closest sequence from our isolate. More information on the  
315 composition of each mapping DB is available elsewhere (5).

316 The reads were mapped on the custom DB using Geneious mapper (Prime 2020.0.5, Biomatters). First, the  
317 profile parameters "Low sensitivity / Fastest" were selected (with 20% mismatch and a maximum of 3  
318 nucleotides gap allowed). To improve the results by aligning reads to each other in addition to the  
319 reference sequence, the fine-tuning for mapping was set to "Iterate 2 times". The "multiple best matches"  
320 option was set to "Randomly" (no multiple best matches between two different viruses were observed in  
321 any sample processed). In the coming result section, we will refer to these parameters as "relax". A second  
322 mapping referred to later on as "strict" was carried out using the same parameters except for the  
323 mismatch allowance that was lower than 10%. Only the second mapping was carried out for small RNA  
324 (20% mismatch is too much for small RNA). Indeed, using mismatches up to 20% should allow better  
325 inclusivity of the analysis by mapping reads from isolates that can be genetically distant from the reference  
326 sequences, especially if few reference genomes are available in the literature. Mapping with a strict  
327 parameter was done to use small RNA and confirm this hypothesis. The tolerance of mismatches of 20%  
328 is also close to many ICTV demarcation criteria to distinguish two different species (although these criteria

329 are often considered for only one or a few genes and might vary between families). Another test with  
 330 more relaxed parameters would increase the risk of adding non-specific reads (e.i. not generated from the  
 331 viral genomes) and was not considered.

332

### 333 **Deduplication of identical reads between samples**

334

335 To investigate cross-contamination between samples, additional deduplication of identical reads between  
 336 samples was performed using dedupe V38.37 (from BBMap) embedded in Geneious (Prime 2020.0.5,  
 337 Biomatters) and with the parameters kmer seed length, maximum edit, and maximum substitutions set as  
 338 "31", "0", and "0", respectively. For each virus and sample, the mapped reads from each tested sample  
 339 and the sample with the highest number of mapped reads in the batch were grouped into a single pool  
 340 (using "Group sequences into a list" in Geneious) and deduplicated. The deduplication percentage equalled  
 341 the number of reads removed as duplicates divided by the lower number of reads between the two tested  
 342 samples. The deduplication percentage was not calculated on samples if less than 5 reads were mapped  
 343 to target viruses. For those samples, the rule (number three) automatically votes contamination. While for  
 344 the samples with the highest number of reads for a given virus, the deduplication ratio was set as reference  
 345 (i.e. "RF"), and the vote for rule three is infection.

### 346 **Confusion matrix and performance criteria calculation**

347

348 We used a confusion matrix for each batch's results to have standard metrics for comparing batches and  
 349 samples. We compared the tool prediction for each element to the indexing status of the dataset  
 350 assimilating infection as a positive result and contamination as a negative result, as explained in **Table 2**.

351 **A**

| Cont-ID confusion matrix |               | Prediction           |                          |
|--------------------------|---------------|----------------------|--------------------------|
|                          |               | Infection (Positive) | Contamination (Negative) |
| Indexing status          | Infection     | True Positive (TP)   | False Negative (FN)      |
|                          | Contamination | False Positive (FP)  | True Negative (TN)       |

352 **B**

|                                     |                         |
|-------------------------------------|-------------------------|
| <b>Diagnostic sensitivity (DSE)</b> | $TP/(TP+FN)$            |
| <b>Diagnostic specificity (DSP)</b> | $TN/(TN+FP)$            |
| <b>False omission rate (FOR)</b>    | $FN/(FN+TN)$            |
| <b>False discovery rate (FDR)</b>   | $FP/(FP+TP)$            |
| <b>Accuracy</b>                     | $(TP+TN)/(TP+TN+FP+FN)$ |

353 **Table 2: (A) Confusion matrix based on Cont-ID results. (B) The formula is used to calculate tool**  
 354 **performance criteria.**

355

356 Based on the confusion matrix, we have four possibilities after a prediction: False Positive (FP) when the  
 357 tool wrongly predicted an infection, True Positive (TP) when the tool correctly predicted an infection,  
 358 False Negative (FN) when the tool wrongly predicted contamination and True Negative (TN) when the

359 tool correctly predicted contamination. In addition, we calculated several performance criteria  
360 commonly used in diagnostics to evaluate our tool. To calculate those performance criteria  
361 automatically, we used an automated script available on the same GitHub  
362 ([https://github.com/johrollin/Cont\\_ID/tree/master/further\\_analysis](https://github.com/johrollin/Cont_ID/tree/master/further_analysis)).

363

## 364 Results

365

366 We used Cont-ID on ten metagenomic datasets, including a total of 273 samples, as a proof of concept  
367 (see details in method). These datasets covered a broad range of use for Cont-ID as they were generated  
368 from plant or human samples according to three library preparation protocols (total RNA, small RNA and  
369 double stranded RNA).

370

### 371 **Set up adaptability metrics datasets on the banana datasets**

372

373 When applying for the first time Cont-ID on banana datasets generated from reference samples with  
374 known viral status, the first objective was to determine the most appropriate values for the adaptability  
375 metrics (X, Y and Z), allowing to minimise both FP (over-prediction of infection) and FN (over-prediction of  
376 contamination). This was particularly complex as raising the value of an adaptability metric could lead to  
377 an over-prediction of either contamination or infection by the rule, while lowering it had the opposite  
378 effect.

379

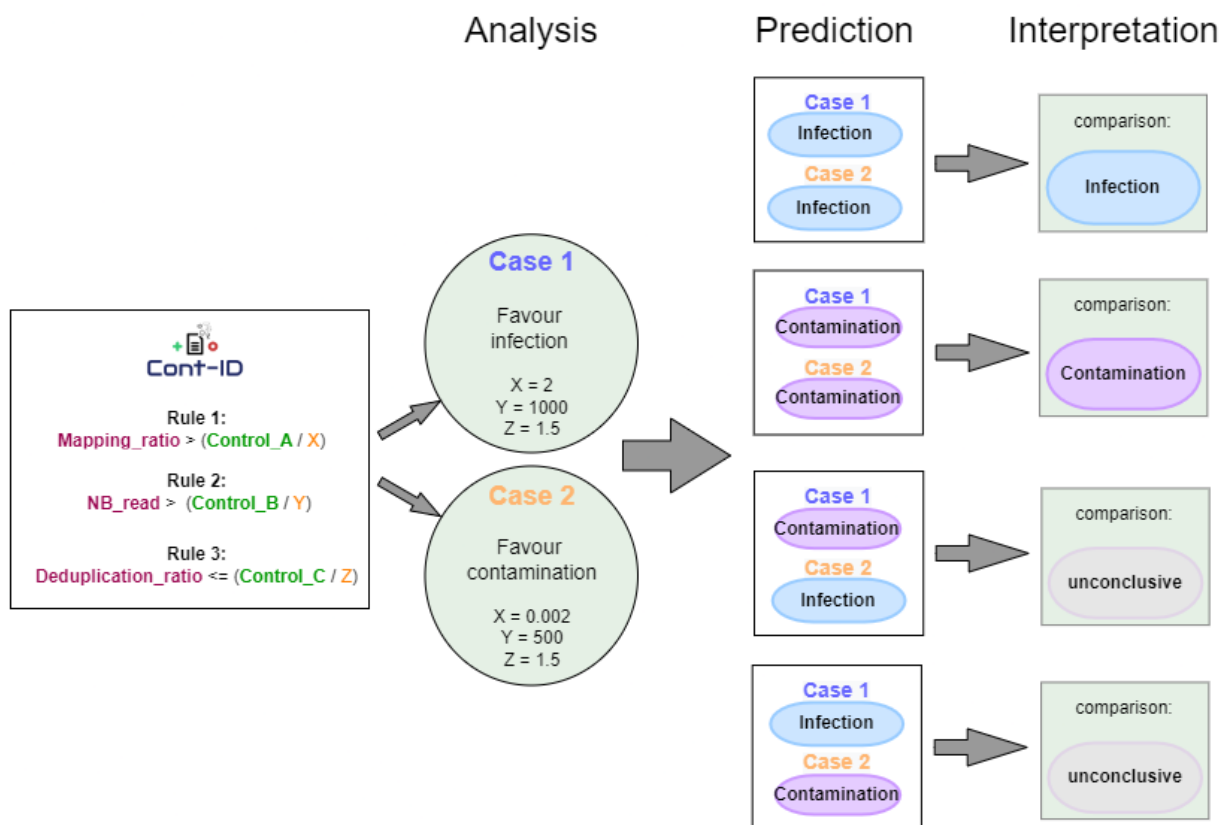

380

381 **Figure 3: Cont-ID prediction when using the two default cases**

382  
 383 During the set-up of the method, we looked for the most adapted set of values to balance our rule  
 384 prediction on *Musa* datasets A, B and C. We tested several ranges of values aiming at limiting both wrong  
 385 predictions (FP and FN). The optimised single set of values maintaining FP and FN low in the three datasets  
 386 was not found. Indeed, variability was observed between batches, as any set limiting FP and FN in one or  
 387 several batches was not optimal for the other batch(es).  
 388 Indeed, the uneven proportion and pattern of cross-contaminations observed in different sequencing  
 389 batches made it very difficult to decide on a unique set of values. Instead, it seemed more efficient to  
 390 apply two different sets of values (called "case 1" and "case 2" further on) that favoured the prediction of  
 391 either true infection (TP - case 1) or true contamination (TN - case 2) from the same datasets. The  
 392 combination of the prediction from both cases would give additional information for interpretation. We  
 393 proposed values that gave the best performance criteria on our training datasets on bananas, and the  
 394 purpose of the diagnostic test was to minimise the risk of false negatives (priority 1) while keeping the  
 395 confirmation burden manageable (priority 2). Importantly, those sets of values can be manually adapted  
 396 by the user to improve one or several performance criteria of the test, to better fit the purpose of the HTS  
 397 tests carried out and its associated risks (risk of false positive or false negative) or to limit the "grey zone"  
 398 of inconclusive results (see under).  
 399 Therefore, we propose to run Cont-ID with two sets of adaptability metrics every time to compare the  
 400 results. Therefore, a high level of confidence is reached for the elements with identical predictions  
 401 between both cases. The combination can also highlight elements for which the prediction changed; they  
 402 correspond to the "grey zone" with metrics of abundance and/or duplication close to thresholds. In such  
 403 cases, the automated prediction might not be accurate. At this stage, it is mandatory to carry on additional  
 404 verification, such as checking the confidence (2 or 3 votes) for each prediction or comparing the threshold  
 405 numbers (also provided in the result) with the sample metrics. Cont-ID provides the list of votes for each  
 406 rule in each case to facilitate this additional verification. Then according to the additional information and  
 407 the test's purpose, the user can decide on the status (infection or contamination) or keep it inconclusive  
 408 but decide to test the virus presence independently by another test. For the presentation of the result,  
 409 the result is mentioned as "inconclusive" when both cases disagree.

410

## 411 Evaluation of the method accuracy on banana samples

412

413 Based on the results obtained with the two sets of adaptability metrics, the tool predictions were  
 414 compared with the biological status of each reference banana sample (batches A, B, C and D  
 415 Supplementary File 2), allowing us to predict the cross-contamination on the four tested batches with an  
 416 average accuracy of 90%, excluding 23% of elements classified as "inconclusive" (see table 3A).

417

| Batch                            |                  | A - Relax mapping |       |        |        | B - Strict mapping |       |       |       |
|----------------------------------|------------------|-------------------|-------|--------|--------|--------------------|-------|-------|-------|
|                                  |                  | A                 | B     | C      | D      | A                  | B     | C     | D     |
| Sequencing method                |                  | TotalRNA          |       |        |        | TotalRNA           |       |       |       |
| Total element tested             |                  | 105               | 93    | 143    | 128    | 76                 | 65    | 93    | 68    |
| Expected Infection/Contamination |                  | 28/77             | 14/79 | 34/109 | 19/109 | 28/48              | 14/51 | 34/59 | 17/51 |
| Case 1                           | 3 votes accuracy | 91%               | 87%   | 86%    | 90%    | 100%               | 92%   | 94%   | 87%   |
|                                  | 2 votes accuracy | 60%               | 60%   | 45%    | 80%    | 69%                | 62%   | 46%   | 69%   |
|                                  | overall accuracy | 73%               | 67%   | 66%    | 85%    | 78%                | 68%   | 62%   | 75%   |
| Case 2                           | 3 votes accuracy | 99%               | 95%   | 100%   | 96%    | 95%                | 92%   | 100%  | 94%   |

|                      |                           |     |     |     |     |     |     |     |     |
|----------------------|---------------------------|-----|-----|-----|-----|-----|-----|-----|-----|
| Cases<br>combination | 2 votes accuracy          | 58% | 69% | 87% | 67% | 70% | 59% | 64% | 44% |
|                      | overall accuracy          | 85% | 85% | 93% | 91% | 83% | 78% | 80% | 82% |
|                      | accuracy %                | 88% | 82% | 94% | 95% | 82% | 78% | 81% | 90% |
|                      | inconclusive %            | 23% | 20% | 33% | 16% | 5%  | 17% | 32% | 28% |
|                      | correct prediction        | 71  | 61  | 90  | 103 | 59  | 42  | 51  | 44  |
|                      | wrong prediction          | 10  | 13  | 6   | 5   | 13  | 12  | 12  | 5   |
|                      | inconclusive (occurrence) | 24  | 19  | 47  | 20  | 4   | 11  | 30  | 19  |

418  
419 **Table 3:** Percentage of the accuracy of case 1 and case 2 analysed alone or in combination on banana  
420 samples sequenced by ribodepleted totalRNA sequencing. Each case is presented with the proportion of  
421 correct or wrong predictions according to the number of votes obtained (2 or 3). The percentage is given  
422 by three votes confidence count only the result with three votes while the overall accuracy aggregates the  
423 2 and 3 vote results. When combining results from both cases, the percentage of inconclusive results and  
424 the number of correct or wrong predictions are stated. Two different mapping parameters were tested,  
425 allowing respectively 20% of mismatches (part A) or 10% of mismatches (part B)

426  
427 The predictions with the three votes using default mapping parameters ("relax mapping") are very  
428 trustworthy as the accuracy is higher than 86% and 95% for cases 1 and 2, respectively. These promising  
429 results are obtained on the fraction of the elements representing 25-50% and 48-84% for case 1 and case  
430 2, respectively. The remaining elements are classified with two votes (more information is available in  
431 Supplementary File 3). The prediction accuracy with two votes is much lower, whatever the case. So,  
432 knowing the number of votes obtained by each element is crucial when the results need to be interpreted  
433 (and this number is always given in the report generated by Cont-ID). For case 1, most elements were  
434 predicted with two votes meaning that one of the (three) rules had the opposite prediction, which might  
435 explain why the accuracy was lower. While for case 2, the majority of the elements were predicted with  
436 three votes. The explanation is probably in the "expected Infection/contamination" row in **Table 3A**: for  
437 all batches, there is more contamination than infection (from 28 infections for 77 contaminations – batch  
438 A to only 19 infections for 109 contaminations - batch D). As stated above in the text and **Figure 3**, Case 2  
439 is designed to favour contamination detection at the expense of infections occurring at a low  
440 concentration that tend to be considered contamination (FN). Nevertheless, as a direct consequence, true  
441 contamination (TN) detection is high (see confusion\_matrix in Supplementary File 3).  
442 Overall, case 2 presented a higher accuracy (85-91% relax mapping) than case 1 (66-85%), while the  
443 combination of the two cases reached a similar one (82-95 % relax mapping). Those good results from  
444 combination accuracy mean that very few predictions are wrong (5 – 13) in both cases, but 16-33% of  
445 elements are not counted in the accuracy percentage because they are inconclusive. The combination's  
446 importance relies on maintaining a high accuracy while highlighting the inconclusive prediction to prioritise  
447 them for manual expertise.

## 448 449 **The mapping parameters impacted the input files and the Cont-ID** 450 **performance**

451  
452 In **Table 3**, we explored the impact on the prediction of two levels of mismatch tolerance (20% and 10%)  
453 when mapping the sequencing reads on the viral genome DB. The goal was to explore if changing a

454 parameter from the primary bioinformatics step delivering the input files of Cont-ID could have an impact  
 455 on the prediction. Strict mapping tends to lower the total number of elements tested due to a decrease in  
 456 the number of samples for which we have very few reads mapped to a candidate virus. Cont-ID has more  
 457 samples to process with a relaxed mapping, which should be better for threshold calculation. Logically, the  
 458 elements lost by the strict mapping parameter should be predicted as "contamination" and present a  
 459 relatively low number of reads. Indeed, those elements are most likely more distant reads (between 20  
 460 and 10 % mismatch with the reference genome) mapped on the virus. They could correspond to non-viral  
 461 reads wrongly mapped in datasets from samples tested negative by classical indexing. For example, for  
 462 batch B, on the 23 differential mapping results, the number of reads mapped ranged from 1 to 10. Of those  
 463 23 elements, 21 are classified as "contamination" the two remaining are labelled inconclusive. In batch C,  
 464 there are 50 differential elements between the two parameters, with 37 correct (13 from BSV), 11  
 465 inconclusive (10 from BSV) and 2 wrong (2 from BSV) classified elements. In total, 25 elements (on the 50  
 466 - batch C) are from the non-integrated virus, of which 24 are labelled contamination (one inconclusive).  
 467 The separation between integrated and non-integrated viruses is explained in **Table 4** and another  
 468 publication (5).

469 Using the relaxed mapping parameter seems beneficial for prediction as the accuracy is better (82-95%  
 470 relax, 78-90% strict). Moreover, thanks to the combination strategy, we can focus on the proportion of  
 471 inconclusive; it is uneven with an important increase, 5% (strict) to 23% (relax) for batch A, while in batch  
 472 D, it decreases from 28% to 16 %. However, when we look closely at the accuracy improvement, most  
 473 comes from differential elements (present only with relax) that are 'obvious' contamination with few  
 474 reads. So, most of the accuracy improvement did not come from very informative elements, except in  
 475 some rare occurrences where it helped classify well elements in relax parameters that were inconclusive  
 476 with strict or classified inconclusive elements in relax that were wrong with strict parameters. As an  
 477 example, in batch C, on the 24 elements for BanMMV, BBRMV, BBTv and CMV common in both conditions  
 478 (relax and strict), elements prediction is improved (from inconclusive [strict] to correct [relax]) for three of  
 479 them (sample 3B1, 3B2 and 3B14 with BanMMV).

480 There is, therefore, a slight improvement with relaxed mapping parameters, and we set these parameters  
 481 by default to generate the input files. Indeed, with the relaxed parameters, the number of reads for each  
 482 element (including alien) increases along the rise of the number of elements in the batch. This means that  
 483 we change the rule's threshold (see Figure 2), which is critical for the threshold calculation in a way that  
 484 seems more representative of reality than strict mapping. In these batches, some element metrics are very  
 485 close to the threshold used for the rules and slightly changing those metrics or the alien metrics (the alien  
 486 control metrics are obviously changed by the mapping parameters) can modify the prediction.

487 As we did not know the divergence of the virus genomes between different samples and the reference  
 488 genomes, it seemed more logical to use relaxed mapping parameters by default. According to the virus  
 489 system the user is working on and the ICTV demarcation criteria that go with it, these parameters should  
 490 or could be adapted.

491

## 492 **The virus biology can impact Cont-ID performance: the case of virus** 493 **integration in the host genome**

494

|                   | A- Non-integrated Virus |   |   |   | B- Integrated Virus (BSV) |   |   |   |
|-------------------|-------------------------|---|---|---|---------------------------|---|---|---|
| Batch             | A                       | B | C | D | A                         | B | C | D |
| Sequencing method | TotalRNA                |   |   |   | TotalRNA                  |   |   |   |

|               | Total element tested             |                           | 40    | 31   | 51    | 55    | 65   | 62   | 92    | 73   |
|---------------|----------------------------------|---------------------------|-------|------|-------|-------|------|------|-------|------|
|               | Expected Infection/Contamination |                           | 19/21 | 9/22 | 22/29 | 10/45 | 9/56 | 5/57 | 12/80 | 9/64 |
| Relax mapping | Case 1                           | 3 votes accuracy          | 100%  | 91%  | 96%   | 100%  | 82%  | 83%  | 68%   | 54%  |
|               |                                  | 2 votes accuracy          | 94%   | 70%  | 75%   | 100%  | 47%  | 56%  | 43%   | 78%  |
|               |                                  | overall accuracy          | 98%   | 77%  | 94%   | 100%  | 58%  | 61%  | 50%   | 74%  |
|               | Case 2                           | 3 votes accuracy          | 100%  | 85%  | 100%  | 100%  | 97%  | 100% | 100%  | 93%  |
|               |                                  | 2 votes accuracy          | 50%   | 91%  | 82%   | 67%   | 62%  | 58%  | 89%   | 67%  |
|               |                                  | overall accuracy          | 88%   | 87%  | 92%   | 96%   | 83%  | 84%  | 93%   | 88%  |
|               | Cases combination                | accuracy %                | 100%  | 88%  | 96%   | 100%  | 79%  | 79%  | 92%   | 91%  |
|               |                                  | inconclusive %            | 15%   | 16%  | 6%    | 4%    | 28%  | 23%  | 48%   | 25%  |
|               |                                  | correct prediction        | 34    | 23   | 46    | 53    | 37   | 38   | 44    | 50   |
|               |                                  | wrong prediction          | 0     | 3    | 2     | 0     | 10   | 10   | 4     | 5    |
|               |                                  | inconclusive (occurrence) | 6     | 5    | 3     | 2     | 18   | 14   | 44    | 18   |

495  
496 **Table 4:** Percentage of the accuracy of case 1 and case 2 analysed alone or in combination on banana  
497 samples sequenced by ribodepleted totalRNA sequencing with relaxed mapping parameters. Each case is  
498 presented with the proportion of correct or wrong predictions according to the number of votes obtained  
499 (2 or 3). The percentage given by three votes confidence count only the result with three votes while the  
500 overall accuracy aggregates the 2 and 3 vote results. When combining results from both cases, the  
501 percentage of inconclusive results and the number of correct or wrong predictions are stated. Two types of  
502 viruses were tested, Non-integrated virus (part A) or integrated virus (part B).

503  
504 To highlight the potential impact of the virus biology on the results of Cont-ID, the analysis of banana  
505 batches was split between integrated and non-integrated viruses. Indeed, several species of BSV are  
506 integrated into its host genome, which complicates the reliable detection of BSV infection from sequencing  
507 datasets. Consequently, it has been recommended to confirm any detection of BSV reads by an  
508 independent PCR test combined with immunocapture of viral particles (5).

509 Table 4 shows better accuracy and a lower proportion of inconclusive results for non-integrated viruses  
510 compared to BSV. More elements with contamination status are obtained when looking for BSV than non-  
511 integrated viral species. This over-representation of contaminants might be caused by the transcription of  
512 integrated sequences of BSV even without viral particles, which will raise the number of detected reads.  
513 These are two points that reduced the efficiency of our method on BSV and, by extension, might also  
514 concern any other viral species integrated into the host genome and able to produce transcripts.

515 The global accuracy is lower for BSV species (79-92%) compared to the other viruses (88-100%), even if  
516 the maximum accuracy obtained with batch C (92%) was high. In addition, the proportion of inconclusive  
517 results should also be considered, and this proportion was much higher for BSV (23-45%) than for the other  
518 viruses (4-16%). So, the overall performance of Cont-ID is lower when applied on BSV and did not solve  
519 the issues of appropriate detection in sequencing data of viral infection from viruses integrated into the  
520 plant genome. Consequently, BSGFV, BSIMV, BSMYV, and BSOLV, which correspond to different but closely  
521 related species of Banana streak virus (BSV) integrated into the *Musa* genome, were excluded from the  
522 calculation of performance criteria for the banana datasets. BSCAV was also excluded (despite not being  
523 integrated) because of its similarity with other BSV species.



524

## 525 Performance of Cont-ID on diverse datasets

526 The performance of Cont-ID using the two cases was further evaluated while diversifying the hosts (fruit  
527 trees, grasses, humans) and the sequencing protocols (total RNA, small RNA, dsRNA).  
528

| Batch                            |                           | A                       | B    | C     | D        | E     | F        | G                                 | H                      | I                           | J                     |      |  |
|----------------------------------|---------------------------|-------------------------|------|-------|----------|-------|----------|-----------------------------------|------------------------|-----------------------------|-----------------------|------|--|
| Origin                           |                           | Banana (own sequencing) |      |       |          |       |          | Plant Mix (Gauthier et al., 2022) | Human (Bal et al 2018) | Human (Boheemen et al 2019) | Human (Li et al 2020) |      |  |
| Sequencing method                |                           | TotalRNA                |      |       | SmallRNA | dsRNA | TotalRNA |                                   |                        |                             | Average               |      |  |
| Total element tested             |                           | 40                      | 31   | 51    | 55       | 20    | 12       | 51                                | 112                    | 62                          | 206                   | 64   |  |
| Expected Infection/Contamination |                           | 19/21                   | 9/22 | 22/29 | 10/45    | 19/1  | 5/7      | 18/33                             | 37/75                  | 25/37                       | 50/156                |      |  |
| Case 1                           | 3 votes accuracy          | 100%                    | 91%  | 96%   | 100%     | 100%  | 100%     | 100%                              | 96%                    | 100%                        | 90%                   | 97%  |  |
|                                  | 2 votes accuracy          | 94%                     | 70%  | 75%   | 100%     | 36%   | 67%      | 86%                               | 71%                    | 54%                         | 63%                   | 72%  |  |
|                                  | overall accuracy          | 98%                     | 77%  | 94%   | 100%     | 55%   | 92%      | 92%                               | 87%                    | 73%                         | 77%                   | 84%  |  |
| Case 2                           | 3 votes accuracy          | 100%                    | 85%  | 100%  | 100%     | 33%   | 100%     | 97%                               | 92%                    | 92%                         | 95%                   | 89%  |  |
|                                  | 2 votes accuracy          | 50%                     | 91%  | 82%   | 67%      | 63%   | 50%      | 92%                               | 68%                    | 84%                         | 78%                   | 72%  |  |
|                                  | overall accuracy          | 88%                     | 87%  | 92%   | 96%      | 45%   | 92%      | 96%                               | 86%                    | 89%                         | 87%                   | 86%  |  |
| Cases combination                | accuracy                  | 100%                    | 88%  | 96%   | 100%     | 50%   | 100%     | 98%                               | 93%                    | 93%                         | 92%                   | 91%  |  |
|                                  | inconclusive %            | 15%                     | 16%  | 6%    | 4%       | 20%   | 17%      | 8%                                | 15%                    | 29%                         | 24%                   | 15%  |  |
|                                  | correct prediction        | 34                      | 23   | 46    | 53       | 8     | 10       | 46                                | 88                     | 41                          | 144                   | 49,3 |  |
|                                  | wrong prediction          | 0                       | 3    | 2     | 0        | 8     | 0        | 1                                 | 7                      | 3                           | 12                    | 3,6  |  |
|                                  | inconclusive (occurrence) | 6                       | 5    | 3     | 2        | 4     | 2        | 4                                 | 17                     | 18                          | 50                    | 14,4 |  |

529

530

531 **Table 5:**

532 *Percentage of the accuracy of case 1 and case 2 analysed alone or in combination from sequencing with*  
533 *relaxed mapping parameters (except for small RNA). Each case is presented with the proportion of correct*  
534 *or wrong predictions according to the number of votes obtained (2 or 3). The percentage given by three*  
535 *votes confidence count only the result with three votes while the overall accuracy aggregates the 2 and 3*  
536 *vote results. When combining results from both cases, the percentage of inconclusive results and the*  
537 *number of correct or wrong predictions are stated. Several virus datasets were tested, banana samples*  
538 *(only non-BSV viruses are considered), a mix of plants, and human datasets.*  
539

540 **Table 5** shows the method's accuracy on all datasets with relaxed mapping parameters (except for small  
541 RNA, see method). Overall, the accuracy of Cont-ID was 94%, with 15% of inconclusive results. The sRNA  
542 dataset provides a poor accuracy (50%) with 20% inconclusive; this can be explained by the (almost)  
543 absence of contamination (Expected Infection/Contamination 19/1) by the low level of reads found (see  
544 Supplementary Files 2 & 3 for more information). Apart from small RNA, the worst accuracy (88%) has  
545 been obtained from the batch B sequencing dataset of banana. Noteworthy, this protocol was  
546 independently evaluated for virus testing in banana, but its performance for virus detection was much  
547 lower than total RNA sequencing (5). The accuracy calculated from the single batch of dsRNA, with only 9  
548 samples and 12 elements, was 100%. Even if not enough representative dataset was used for dsRNA, the  
549 method accuracy seems not too far from what we obtained in Total RNA, indicating that, Cont-ID is  
550 independent of the extraction method. On Total RNA, for banana samples, the accuracy ranged from 88%  
551 to 100%, with 4% to 15% of inconclusive results. The accuracy of the plant mix (G) was also very high (98%),  
552 with 8% of inconclusive results. On human datasets, the accuracy remained high (92-93%), but the

553 inconclusive results reached up to 15 - 29%. Overall, the application of Cont-ID on human datasets reached  
554 similar performance in accuracy; the slightly worse inconclusive metrics can be explained by the fact that  
555 the adaptability metrics might not be the best ones for the human dataset and underlined the importance  
556 given at Cont-ID for the flexible adaptation of metrics and parameters.

557 For most of the datasets, case 1 performed worse than case 2, probably due to the design of the case  
558 metrics (see **Figure 2**), where case 1 values were determined to favour infection. The expected  
559 infection/contamination ratio showed that for all the datasets but E (small RNA), there was a lot more  
560 contamination than infection; therefore, case 1 overpredicted infection, lowering its accuracy. In the E  
561 dataset, case 1 (55%) performed better than case 2 (45%) as expected; it is also the case for the human  
562 dataset H (97% case 1, 96% case 2), even if the ratio (37/75) leans toward contamination.

563  
564 Those results indicated that Cont-ID performed well in classifying cross-contamination in very different  
565 virus-host systems, even if some adjustments may be needed in some cases in the future. The different  
566 levels of flexibility of Cont-ID made such adjustments possible. To provide an example of analysis, all the  
567 information regarding batch C from the input file to the analysis file (including raw results) is available in  
568 Supplementary File 3.

569

## 570 **Discussion**

571  
572 Despite significant efforts to limit cross-contamination (dual indexes, inter-run washing ...), this still  
573 represent a concern and the appropriate distinction between low-level infection, and cross-sample  
574 contamination is crucial for the large-scale development of HTS technologies as a diagnostic test.  
575 Furthermore, it should be adequately managed because identifying and monitoring the cross-  
576 contaminations improves the detection results' reliability. In other words, it can help to find the source of  
577 contamination in the laboratory, take appropriate measures to minimise it, and raise confidence in the  
578 detected viruses.

579 This publication improved a preliminary work on determining an adaptative contamination threshold for  
580 the detection of plant viruses (5), which uses the maximal number of alien virus reads contaminating a  
581 sample as the threshold of detection for each sequencing batch. So, instead of using a fixed number for  
582 the contamination threshold as done in the literature, the threshold is adapted to the level of  
583 contamination monitored in the batch thanks to the alien control. The former publication used a single  
584 threshold corresponding to the maximum number of alien virus reads in a sample. Some limitations of this  
585 previous threshold, for example, overestimating contamination when viral reads are in low number for a  
586 virus, underlined the need for improvements. This was achieved with Cont-ID through the definition of  
587 multiple formal rules, the automation of calculation and the ability to adapt the thresholds and rules by  
588 the user. The tool's prediction relies on basic and usual information generated by bioinformatics analysis  
589 of sequencing data (mapping and duplication numbers) and the use of external alien control. The criteria  
590 based on reads (relative) abundance of each virus in each sample and the (approximation of) number of  
591 identical reads for a virus between samples performed well while being relatively easy to generate. Our  
592 objective with this tool was to show that exploring data generated by standard bioinformatic procedures  
593 can facilitate the identification of cross-contamination between samples.

594 Cont-ID discriminated virus infection and cross-contamination between samples with a global accuracy of  
595 91 % (median=95%) on the diverse range of datasets included in its evaluation. The diversity of situations  
596 included viral species belonging to diverse viral families with cellular hosts belonging to plant or animal  
597 kingdoms and three different library preparation protocols. Importantly, the default values of adaptability  
598 metrics determined from banana dataset predicted cross-contamination with high accuracy (96%, on  
599 banana excluding small RNA) and remain high even on human datasets (94%). To further help the user in

600 the analysis, we provide the detailed votes prediction in the result file (see Supplementary File 3). This is,  
601 therefore, a solid basis for the diagnostician to check the level of confidence in the generated results.  
602 Indeed, each prediction made by the method uses at least two rules to determine the classification of the  
603 element for each case. A prediction with three votes is more confident than with two votes. But all  
604 predictions with two votes do not provide the same confidence as it depends on which rules predicted  
605 what. Of our three rules, two rely more or less directly on abundance estimation, which means that when  
606 that metric is not obtainable in a reliable way, the tools' predictions will be impacted, and predictions with  
607 those rules might be less confident. On the other hand, rule three (deduplication ratio) is less effective  
608 when the read numbers are low. Depending on the scenario, the user should consider the relative  
609 confidence of each rule when trying to confirm Cont-ID prediction. This underlines again the importance  
610 of proper interpretation of the obtained results based on the virus biology

611  
612 The prediction quality depends on the input data quality, meaning that the deduplication and mapping  
613 parameters are essential and should be carefully considered while evaluating their impact on the results.  
614 For example, some deduplication tools remove reads if a (small) read is contained in another (larger) read;  
615 having that option active or not will significantly impact the deduplication ratio. As shown in the results,  
616 mismatch parameters are very impactful for the mapping. Considerations like ICTV demarcation criteria  
617 or what parameters the biologist would use to reconstruct the whole viral genome are helpful in deciding  
618 the ones to use for Cont-ID input. In that regard, testing and expertise in bioinformatics analysis are heavily  
619 beneficial. Here, the 20% mismatch parameter performed well; it might be different in other datasets (viral  
620 composition) configurations or when working with databases containing many reference genomes.  
621 Indeed, independently of the mismatch parameters used, using more genome references for each  
622 expected species could also improve the ability to detect sequences from distant isolates by better  
623 covering the genetic diversity of the virus.

624 The biology of the virus should also be considered, as shown by the results obtained with viruses with  
625 functionally integrated genomes in the host, like BSV species. Our conclusion is that they should be  
626 considered independently from the non-integrated viruses. It was challenging to extract a reliable metric  
627 for BSV as the differentiation between reads from integrated genomes and reads from viral particles is  
628 impossible. Indeed, the biology of viruses integrated into the host genome differs from non-integrated  
629 viruses, as viral genome transcription can happen without viral particle production. We have not tested  
630 our method on species with different biological behaviour like viroids or phages. But optimisation of the  
631 adaptative metrics might likely be required in order the use Cont-ID with high accuracy. Viroid genomes  
632 are generally smaller than viruses, while the phage genome tends to be much larger and has specific  
633 biological features. For example, a different level of identical reads and abundance (calculation based on  
634 reads number) could be obtained between the different scales of genome size.

635 For these reasons, Cont-ID allows the evaluation of other values for adaptability metrics (X, Y, Z) by each  
636 user to adapt the tool and optimise its diagnostic performance depending on the biological matrix, the  
637 protocol and the purpose of the test. Independently, the user can also adapt the metrics to reach the  
638 appropriate balance between FN and FP by deciding if, for the purpose of the test and the available  
639 resource for confirming detection, it is preferable to be overpredicting contamination to be confident that  
640 all the virus detection remaining are true infection or the opposite (overpredicting infection to be sure not  
641 to miss any).

642 In our tests, the analysis of the wrong predictions showed that none of the proposed rules (and  
643 adaptability metrics values) allowed us to reach satisfactory accuracy with a proper balance between FN  
644 and FP (see Supplementary File 1). We have observed that using two sets of adaptability metrics (one to  
645 favour contamination and the other, infection prediction) gave a higher accuracy. In a real scenario (with

646 infection status not known for the samples), it is difficult to know if HTS virus detection (at low  
647 concentration) is in the majority due to true infection or cross-contamination. The two-case strategy  
648 allows the biologist to predict both scenarios with at least one case accurately. Indeed, if the expected  
649 ratio of infection/contamination is unknown, the relative performance of cases 1 or 2 will be unknown,  
650 so it seems preferable to use the combination results instead of the individual.

651 If both cases agree, the assumption is that the prediction is correct. Nevertheless, combining the results  
652 will provide a list of interesting inconclusive results. Each inconclusive result means that the two cases  
653 delivered opposite predictions. Therefore, the scientist should address those results when analysing  
654 Cont-ID prediction by checking the number of rules for each prediction, for example, knowing if 2 or 3  
655 rules agreed and checking the results of each rule : How close to the threshold was the read  
656 abundance/ratio and/or the duplication rate? Spotting the few errors that may occur requires excellent  
657 manual expertise as the usual manual verification methods may also indicate the wrong decision (if there  
658 are many reads from cross-contamination, the mapping results can be wrongly positive while the and/or  
659 the (RT)-PCR can also be wrongly positive if the contamination occurred at an early stage and the (RT)-  
660 PCR was carried out on the same nucleic acids extract). Other information about the virus-plant  
661 interaction should be considered, like virus-species-cultivar compatibility or geographical virus  
662 distribution (see investigation on unexpected viruses (5)).

663  
664 Cont-ID also presents some limitations that need to be discussed. First, the number of identical reads  
665 estimation comes from the deduplication procedure, which is an approximation, and that can be a problem  
666 because it can consider the non-specific reads (reads that are not coming from cross-contamination but  
667 that are identical to another sample from a common area of the genome) as identical to the probable  
668 source of contamination by mistake. Indeed, this can be the case if, for example, two samples are infected  
669 by the same virus isolate at very different concentrations. The presence of duplicated reads might suggest  
670 contamination instead of a low-level infection. The risk of such an extreme situation is limited using two  
671 other rules, although interpreting the data will require good expertise in virus genomic variability and  
672 detailed information on the sample origins and virus prevalence and diversity.

673 In addition, the duplication metric assumes that contamination (if any) comes from the sample with the  
674 highest number of reads. This theory seems logical since the more reads in a sample, the higher the  
675 probability of detecting a few reads from it contaminating other samples (potential of contamination).  
676 Nevertheless, it can create a bias when a virus is highly abundant in two (or more) samples and detected  
677 with a low frequency in others. In that case, it is difficult to determine the true origin of cross-  
678 contamination. Such a case could be a fundamental limit of our current method. If several samples with a  
679 very high abundance of reads are present in a batch, as developed here, Cont-ID should be applied as many  
680 times as the number of highly abundant samples. Ideally, Cont-ID should include the read duplication  
681 comparison of each sample to all other samples for a virus, but this can raise additional issues (like  
682 contamination from several origins at the same time), and, at this stage, it was not implemented.

683 We must also keep in mind that the relative quantity of genetic material between samples might change  
684 because the biologist normalises the quantity of DNA/RNA at two steps of the process: before starting  
685 library preparation and during the pooling of the prepared libraries. Meaning that the differential in  
686 genomic material concentration (potential of contamination of a sample) is resettled. If cross-  
687 contamination happens before that step, it can cause less accurate predictions from Cont-ID. This bias in  
688 the estimation of abundance is another limitation of our method.

689 Using an (alien) control helps to know the expected level of contamination but is also impacted by the limit  
690 of detection inherent to the standard bioinformatic procedures. Indeed, working with very few reads for  
691 some viruses makes some analyses impossible when below their detection limit. For example, the

692 calculation of the duplication rate below a minimal number of reads (in this study, we chose 5) of a virus  
693 did not make sense. The limit of calculation of the input metrics is another limitation of Cont-ID.

694  
695 Cont-ID accuracy was high, but additional improvements can probably be explored. For example, by  
696 exploiting the ability of other metrics generated during bio-informatic analyses (like RKPM, genome  
697 coverage percentage, relative coverage depth repartition, ...) to help detect contamination. In fact, some  
698 of these metrics with several thresholds were tested for Cont-ID before selecting the three rules described  
699 in **Figure 2** that provided the highest accuracy (in both contamination and infection determination).  
700 Importantly, values leading to a perfect scenario were not identified, and a two-cases classification system  
701 was set up (more information in Supplementary File 1).

702 Nevertheless, adding more metrics will also complexify the decision system. If more metrics are considered  
703 for cross-contamination prediction, other implementations (decision tree, machine learning ...) might be  
704 envisioned to replace the current voting system. On the other hand, the detection in the alien control of  
705 sequencing reads of other viruses detected in the tested samples is also the consequence of contamination  
706 from one of the tested samples toward the alien control. This information is not used now but could also  
707 be considered for future improvements as it requires less complex to implement. In addition, it might allow  
708 refinement of Cont-ID, potentially introducing an adaptation of threshold per virus instead of a single  
709 threshold for all samples from the sequencing batch. The idea is that two viruses present in the same batch  
710 may have different relative abundance behaviour in the samples, so setting up a limit that can adapt for  
711 each virus should improve the tool's ability to distinguish real infection from cross-contamination. Finally,  
712 working with the combination of all/some viruses profile instead of each individually for contamination  
713 check (similarly to what is used in metabarcoding of bacteria) can also be considered. Indeed, when a  
714 sample contaminates another, it is expected that all the viruses (highly frequent) from the contaminating  
715 sample can be found in the contaminated samples. Monitoring the virus detection profile of samples can  
716 provide additional information for cross-contamination (and ease the quest for contamination origin).  
717 Even if there is still improvement to be made, Cont-ID has already delivered an excellent ability to consider  
718 the level of contamination genuinely present in the batch.

719  
720 In conclusion, detection of cross-contamination is complex; in the age of sequencing, the contaminant  
721 issue is increasingly important; therefore, Cont-ID will facilitate the interpretation of results by the  
722 virologist/diagnostician and reduces the confirmation burden. We demonstrated that simple metrics like  
723 relative abundance estimation and redundancies of genetic material (reads duplicates) could help monitor  
724 contamination occurring in the laboratory. The method accurately distinguished cross-contamination from  
725 infection in very diverse HTS viral datasets. Our standard parameters allowed very good accuracy (median  
726 = 95%); in addition, Cont-ID has several levels of flexibility and can be adapted by each user to take into  
727 account the specificities of the detection test (purpose of the test, type of samples, viruses to be detected,  
728 laboratory work, available resources....). We believe this is the first significant step toward increasing the  
729 monitoring and management of sample cross-contamination when using HTS technologies for virus  
730 detection.

731

732

## 733 **Availability and requirements:**

734

735 Project name: Cont-ID

736

737 Project home page: [https://github.com/johrollin/Cont\\_ID](https://github.com/johrollin/Cont_ID)

738

739 Operating system(s): Platform independent

740

741 Programming language: Python (v3.7)

742

743 Other requirements: pandas; NumPy

744

745 License: GNU GPL-3.0

746

747 Any restrictions to use by non-academics: none

748

## 749 **Declarations**

### 750 **Ethics approval and consent to participate**

751 Not applicable.

752

### 753 **Consent for publication**

754 Not applicable.

755

### 756 **Availability of data and materials**

757 The datasets generated and/or analysed during the current study are available in the NCBI Sequence Read  
758 Archive (SRA) repository at <https://www.ncbi.nlm.nih.gov/sra> (See Table 1). In addition, cont-ID is freely  
759 available and can be downloaded with the following command (without <>):  
760 <[https://github.com/johrollin/Cont\\_ID](https://github.com/johrollin/Cont_ID)>. It can be used as a command line application on a personal  
761 computer on any operating system (Linux, MacOSX or Windows) with python.

762

### 763 **Competing interests**

764 The authors declare that they have no competing interests.

765

### 766 **Funding**

767 The work has been supported by (1) the European Union's Horizon 2020 research and innovation program  
768 under the Marie Skłodowska-Curie grant agreement No 813542T (INEXTVIR), and (2) the NGS cross-centre  
769 project from the CGIAR Fund and in particular by the Germplasm Health Unit (GHU) of the CGIAR Genebank  
770 Platform

771

### 772 **Authors' contributions**

773 WR and SM designed the data preparation and sequencing procedure. WR, JR and SM designed the  
774 bioinformatics analysis. JR implemented the program. JR ran CroCo analyses. WR and JR validated Cont-ID  
775 results with previous PCR indexing results and re-analysed outlier. JR and SM drafted the manuscript. All  
776 authors read and approved the final manuscript.

777

### 778 **Acknowledgements**

779 We thank Angelo Locicero for technical support and Gladys Rufflard for administrative support. Delphine  
780 Masse (ANSES, La Réunion, France), Kathy Crew and John Thomas (Queensland Alliance for Agriculture  
781 and Food Innovation, Brisbane, Australia), Mathieu Chabannes and Marilyne Caruana (CIRAD, Montpellier,  
782 France) are also acknowledged for kindly providing Musa reference samples. Special thanks to Marie-

783 Emilie Gauthier and Roberto Barrero for providing dataset G and discussing cross-contamination in viral  
784 metagenomes with us.

785

## 786 Reference

787

- 788 1. Lebas B, Adams I, Rwahnih M al, Baeyen S, Bilodeau GJ, Blouin AG, et al. Facilitating the adoption  
789 of high-throughput sequencing technologies as a plant pest diagnostic test in laboratories: A step-  
790 by-step description. *EPPO Bulletin* [Internet]. 2022 Aug 1;52(2):394–418. Available from:  
791 <https://onlinelibrary.wiley.com/doi/full/10.1111/epp.12863>
- 792 2. Massart S, Olmos A, Jijakli H, Candresse T. Current impact and future directions of high  
793 throughput sequencing in plant virus diagnostics. *Virus Res*. 2014 Aug 8;188:90–6.
- 794 3. Charlebois RL, Sathiamoorthy S, Logvinoff C, Gisonni-Lex L, Mallet L, Ng SHS. Sensitivity and  
795 breadth of detection of high-throughput sequencing for adventitious virus detection. *npj Vaccines*  
796 2020 5:1 [Internet]. 2020 Jul 17;5(1):1–8. Available from:  
797 <https://www.nature.com/articles/s41541-020-0207-4>
- 798 4. Soltani N, Stevens KA, Klaassen V, Hwang MS, Golino DA, al Rwahnih M. Quality Assessment and  
799 Validation of High-Throughput Sequencing for Grapevine Virus Diagnostics. Vol. 13, *Viruses* .  
800 2021.
- 801 5. Rong W, Rollin J, Hanafi M, Roux N, Massart S. Validation of high throughput sequencing as virus  
802 indexing test for Musa germplasm: performance criteria evaluation and contamination  
803 monitoring using an alien control. *PhytoFrontiers*. 2022;
- 804 6. Maree HJ, Fox A, al Rwahnih M, Boonham N, Candresse T. Application of hts for routine plant  
805 virus diagnostics: state of the art and challenges. *Front Plant Sci* [Internet]. 2018 Aug [cited 2019  
806 Nov 15];9. Available from: <https://www.ncbi.nlm.nih.gov/pmc/articles/PMC6119710/>
- 807 7. Ng SH, Braxton C, Eloit M, Feng SF, Fagnoud R, Mallet L, et al. Current perspectives on high-  
808 throughput sequencing (HTS) for adventitious virus detection: Upstream sample processing and  
809 library preparation [Internet]. Vol. 10, *Viruses*. 2018. Available from:  
810 <https://www.ncbi.nlm.nih.gov/pmc/articles/PMC6213814/>
- 811 8. Kumar R, Nagpal S, Kaushik S, Mendiratta S. COVID-19 diagnostic approaches: different roads to  
812 the same destination. *VirusDisease* 2020 31:2 [Internet]. 2020 Jun 13 [cited 2021 Oct  
813 20];31(2):97–105. Available from: <https://link.springer.com/article/10.1007/s13337-020-00599-7>
- 814 9. Vereecke N, Carnet F, Pronost S, Vanschandevijl K, Theuns S, Nauwynck H. Genome Sequences of  
815 Equine Herpesvirus 1 Strains from a European Outbreak of Neurological Disorders Linked to a  
816 Horse Gathering in Valencia, Spain, in 2021 [Internet]. Vol. 10, *Microbiology Resource*  
817 *Announcements*. American Society for Microbiology; 2021 [cited 2021 Oct 20]. Available from:  
818 <https://doi.org/>
- 819 10. Olmos A, Boonham N, Candresse T, Gentit P, Giovani B, Kutnjak D, et al. High-throughput  
820 sequencing technologies for plant pest diagnosis: challenges and opportunities. *EPPO Bulletin*.  
821 2018 Aug;48(2):219–24.

- 822 11. Lau HY, Botella JR. Advanced DNA-based point-of-care diagnostic methods for plant diseases  
823 detection. *Front Plant Sci.* 2017 Dec 6;8:2016.
- 824 12. Grosdidier M, Aguayo J, Marçais B, loos R. Detection of plant pathogens using real-time PCR: how  
825 reliable are late Ct values? *Plant Pathol [Internet]*. 2017 Apr 1 [cited 2022 Jul 11];66(3):359–67.  
826 Available from: <https://onlinelibrary.wiley.com/doi/full/10.1111/ppa.12591>
- 827 13. Moonen P, Boonstra J, Hakze- Van Der Honing R, Boonstra- Leendertse C, Jacobs L, Dekker A.  
828 Validation of a LightCycler-based reverse transcription polymerase chain reaction for the  
829 detection of foot-and-mouth disease virus. *J Virol Methods.* 2003 Oct 1;113(1):35–41.
- 830 14. Watzinger F, Ebner K, Lion T. Detection and monitoring of virus infections by real-time PCR. *Mol*  
831 *Aspects Med.* 2006 Apr 1;27(2–3):254–98.
- 832 15. Martínez M, de Viedma DG, Alonso M, Andrés S, Bouza E, Cabezas T, et al. Impact of Laboratory  
833 Cross-Contamination on Molecular Epidemiology Studies of Tuberculosis. *J Clin Microbiol*  
834 *[Internet]*. 2006 Aug [cited 2021 Oct 26];44(8):2967–9. Available from:  
835 </pmc/articles/PMC1594630/>
- 836 16. Bukowska-Oško I, Perlejewski K, Nakamura S, Motooka D, Stokowy T, Kosińska J, et al. sensitivity  
837 of next-generation sequencing metagenomic analysis for detection of RNA and DNA viruses in  
838 cerebrospinal fluid: The confounding effect of background contamination. *Adv Exp Med Biol*  
839 *[Internet]*. 2017 Nov 1 [cited 2022 Jul 11];944:53–62. Available from:  
840 [https://link.springer.com/chapter/10.1007/5584\\_2016\\_42](https://link.springer.com/chapter/10.1007/5584_2016_42)
- 841 17. Gauthier MEA, Lelwala R v, Elliott CE, Windell C, Fiorito S, Dinsdale A, et al. Side-by-Side  
842 Comparison of Post-Entry Quarantine and High Throughput Sequencing Methods for Virus and  
843 Viroid Diagnosis. *Biology 2022, Vol 11, Page 263 [Internet]*. 2022 Feb 8 [cited 2022 Feb  
844 14];11(2):263. Available from: <https://www.mdpi.com/2079-7737/11/2/263>
- 845 18. Bloom JS, Sathe L, Munugala C, Jones EM, Gasperini M, Lubock NB, et al. Swab-Seq: A high-  
846 throughput platform for massively scaled up SARS-CoV-2 testing. *medRxiv.* 2021  
847 Mar;2020.08.04.20167874.
- 848 19. Ballenghien M, Faivre N, Galtier N. Patterns of cross-contamination in a multispecies population  
849 genomic project: detection, quantification, impact, and solutions. *BMC Biol [Internet]*. 2017 Mar  
850 29 [cited 2021 Oct 26];15(1). Available from: </pmc/articles/PMC5370491/>
- 851 20. Costello M, Fleharty M, Abreu J, Farjoun Y, Ferriera S, Holmes L, et al. Characterisation and  
852 remediation of sample index swaps by non-redundant dual indexing on massively parallel  
853 sequencing platforms. *BMC Genomics [Internet]*. 2018 May 8;19(1):1–10. Available from:  
854 <https://bmcbgenomics.biomedcentral.com/articles/10.1186/s12864-018-4703-0>
- 855 21. Champlot S, Berthelot C, Pruvost M, Andrew Bennett E, Grange T, Geigl EM. An Efficient  
856 Multistrategy DNA Decontamination Procedure of PCR Reagents for Hypersensitive PCR  
857 Applications. *PLoS One [Internet]*. 2010;5(9):e13042. Available from:  
858 <https://journals.plos.org/plosone/article?id=10.1371/journal.pone.0013042>



- 859 22. Massart S, Lebas B, Chabirand A, Chappé AM, Dreo T, Faggioli F, et al. Guidelines for improving  
860 statistical analyses of validation datasets for plant pest diagnostic tests. *EPPO Bulletin* [Internet].  
861 2022 Aug 1;52(2):419–33. Available from:  
862 <https://onlinelibrary.wiley.com/doi/full/10.1111/epp.12862>
- 863 23. Wood DE, Lu J, Langmead B. Improved metagenomic analysis with Kraken 2. *Genome Biol*  
864 [Internet]. 2019 Sep [cited 2020 Jan 14];20(1):762302. Available from:  
865 <https://www.biorxiv.org/content/10.1101/762302v1>
- 866 24. Camacho C, Coulouris G, Avagyan V, Ma N, Papadopoulos J, Bealer K, et al. BLAST+: architecture  
867 and applications. *BMC Bioinformatics* [Internet]. 2009 Dec 15 [cited 2022 Jul 12];10. Available  
868 from: <https://pubmed.ncbi.nlm.nih.gov/20003500/>
- 869 25. Sukhorukov G, Khalili M, Gascuel O, Candresse T, Marais-Colombel A, Nikolski M. VirHunter: A  
870 Deep Learning-Based Method for Detection of Novel RNA Viruses in Plant Sequencing Data.  
871 *Frontiers in Bioinformatics*. 2022 May 13;2.
- 872 26. Lefebvre M, Theil S, Ma Y, Candresse T. The VirAnnot Pipeline: A Resource for Automated Viral  
873 Diversity Estimation and Operational Taxonomy Units Assignment for Virome Sequencing Data.  
874 <https://doi.org/101094/PBIOMES-07-19-0037-A> [Internet]. 2019 Oct 21 [cited 2021 Oct  
875 25];3(4):256–9. Available from: [https://apsjournals.apsnet.org/doi/abs/10.1094/PBIOMES-07-19-](https://apsjournals.apsnet.org/doi/abs/10.1094/PBIOMES-07-19-0037-A)  
876 [0037-A](https://apsjournals.apsnet.org/doi/abs/10.1094/PBIOMES-07-19-0037-A)
- 877 27. Zheng Y, Gao S, Padmanabhan C, Li R, Galvez M, Gutierrez D, et al. VirusDetect: An automated  
878 pipeline for efficient virus discovery using deep sequencing of small RNAs. *Virology* [Internet].  
879 2017 Jan 1 [cited 2021 Oct 25];500:130–8. Available from:  
880 <https://linkinghub.elsevier.com/retrieve/pii/S0042682216303166>
- 881 28. Ison J, Kalaš M, Jonassen I, Bolser D, Uludag M, McWilliam H, et al. EDAM: an ontology of  
882 bioinformatics operations, types of data and identifiers, topics and formats. *Bioinformatics*  
883 [Internet]. 2013 May 15 [cited 2021 Oct 25];29(10):1325–32. Available from:  
884 <https://academic.oup.com/bioinformatics/article/29/10/1325/255660>
- 885 29. Low AJ, Koziol AG, Manninger PA, Blais B, Carrillo CD. ConFindr: rapid detection of intraspecies  
886 and cross-species contamination in bacterial whole-genome sequence data. *PeerJ* [Internet]. 2019  
887 May 31 [cited 2021 Feb 11];7(5):e6995. Available from: [/pmc/articles/PMC6546082/](https://pubmed.ncbi.nlm.nih.gov/32811111/)
- 888 30. Orakov A, Fullam A, Coelho LP, Khedkar S, Szklarczyk D, Mende DR, et al. GUNC: detection of  
889 chimerism and contamination in prokaryotic genomes. *Genome Biology* 2021 22:1 [Internet].  
890 2021 Jun 13 [cited 2021 Jul 24];22(1):1–19. Available from:  
891 <https://genomebiology.biomedcentral.com/articles/10.1186/s13059-021-02393-0>
- 892 31. Simion P, Belkhir K, François C, Veyssier J, Rink JC, Manuel M, et al. A software tool "CroCo"  
893 detects pervasive cross-species contamination in next generation sequencing data. *BMC Biol*.  
894 2018;16(1):1–9.
- 895 32. Sangiovanni M, Granata I, Thind AS, Guarracino MR. From trash to treasure: detecting  
896 unexpected contamination in unmapped NGS data. *BMC Bioinformatics* [Internet]. 2019 Apr 18  
897 [cited 2021 Oct 25];20(Suppl 4). Available from: [/pmc/articles/PMC6472186/](https://pubmed.ncbi.nlm.nih.gov/32811111/)

- 898 33. Li H, Durbin R. Fast and accurate short read alignment with Burrows-Wheeler transform.  
899 Bioinformatics [Internet]. 2009 Jul [cited 2022 Apr 28];25(14):1754–60. Available from:  
900 <https://pubmed.ncbi.nlm.nih.gov/19451168/>
- 901 34. Lu J, Breitwieser FP, Thielen P, Salzberg SL. Bracken: Estimating species abundance in  
902 metagenomics data. PeerJ Comput Sci [Internet]. 2017 Jan 2 [cited 2022 Jul 12];2017(1):e104.  
903 Available from: <https://peerj.com/articles/cs-104>
- 904 35. Kechin A, Boyarskikh U, Kel A, Filipenko M. CutPrimers: A New Tool for Accurate Cutting of  
905 Primers from Reads of Targeted Next Generation Sequencing. Journal of Computational Biology  
906 [Internet]. 2017 Nov 1 [cited 2022 Mar 27];24(11):1138–43. Available from:  
907 <https://www.liebertpub.com/doi/full/10.1089/cmb.2017.0096>
- 908 36. de Clerck C, Crew K, van den houwe I, McMichael L, Berhal C, Lassois L, et al. Lessons learned  
909 from the virus indexing of Musa germplasm: insights from a multiyear collaboration. Annals of  
910 Applied Biology [Internet]. 2017 Jul 1 [cited 2022 Jun 19];171(1):15–27. Available from:  
911 <https://onlinelibrary.wiley.com/doi/full/10.1111/aab.12353>
- 912 37. Marais A, Faure C, Bergey B, Candresse T. Viral Double-Stranded RNAs (dsRNAs) from Plants:  
913 Alternative Nucleic Acid Substrates for High-Throughput Sequencing. Methods in Molecular  
914 Biology [Internet]. 2018 [cited 2021 Nov 19];1746:45–53. Available from:  
915 [https://link.springer.com/protocol/10.1007/978-1-4939-7683-6\\_4](https://link.springer.com/protocol/10.1007/978-1-4939-7683-6_4)
- 916 38. Chabannes M, Gabriel M, Aksa A, Galzi S, Dufayard JF, Iskra-Caruana ML, et al. Badnaviruses and  
917 banana genomes: a long association sheds light on Musa phylogeny and origin. Mol Plant Pathol.  
918 2021 Feb;22(2):216–30.
- 919 39. Ricciuti E, Laboureau N, Nombissié G, Chabannes M, Sukhikh N, Pooggin MM, et al.  
920 Extrachromosomal viral DNA produced by transcriptionally active endogenous viral elements in  
921 non-infected banana hybrids impedes quantitative PCR diagnostics of banana streak virus  
922 infections in banana hybrids. Journal of General Virology [Internet]. 2021 Nov 2 [cited 2021 Nov  
923 19];102(11):001670. Available from:  
924 <https://www.microbiologyresearch.org/content/journal/jgv/10.1099/jgv.0.001670>
- 925 40. Bal A, Pichon M, Picard C, Casalegno JS, Valette M, Schuffenecker I, et al. Quality control  
926 implementation for universal characterisation of DNA and RNA viruses in clinical respiratory  
927 samples using single metagenomic next-generation sequencing workflow. BMC Infectious  
928 Diseases 2018 18:1 [Internet]. 2018 Oct 29 [cited 2021 Oct 25];18(1):1–10. Available from:  
929 <https://link.springer.com/articles/10.1186/s12879-018-3446-5>
- 930 41. Li CX, Li W, Zhou J, Zhang B, Feng Y, Xu CP, et al. High resolution metagenomic characterisation of  
931 complex infectomes in paediatric acute respiratory infection. Scientific Reports 2020 10:1  
932 [Internet]. 2020 Mar 3 [cited 2021 Oct 25];10(1):1–11. Available from:  
933 <https://www.nature.com/articles/s41598-020-60992-6>
- 934 42. Boheemen S van, Rijn AL van, Pappas N, Carbo EC, Vorderman RHP, Sidorov I. Since January 2020  
935 Elsevier has created a COVID-19 resource centre with free information in English and Mandarin

936 on the novel coronavirus COVID- research that is available on the COVID-19 resource centre -  
937 including this with acknowledgement of the origin. 2020;(January).

938
